# Supplementary material
Source: PubMed Central journal article supplement (PMC4188451)
Supplement: NIHMS632036-supplement-supplement_1.pdf [file NIHMS632036-supplement-supplement_1.pdf]

## Supplementary Information

Zhong-Liu Wu • Jing Qiao • Zhi-Gang Zhang • F. Peter Guengerich • Yan Liu •

Xiao-Qiong Pei

*Biotechnology Letters* (2009)

### **Enhanced bacterial expression of several mammalian cytochrome P450s by codon optimization and chaperone coexpression**

Table S1. Oligonucleotides for the synthesis of Synthon 1 of 27C1org

Table S2. Oligonucleotides for the synthesis of Synthon 2 of 27C1org

Table S3. Oligonucleotides for the synthesis of optimized 2B1

Table S4. Oligonucleotides for site direct mutagenesis of 2S1 and 2U1 to modify N-terminal contiguous rare codons

Table S5. Oligonucleotides for N-terminal modifications of 2B1 and 2W1

Table S6. Nucleotide analysis of P450s with optimized or original codons

Figure S1. Modifications introduced into P450 2B1 cDNA to optimize codon usage in *E. coli*

Table S1. Oligonucleotides for the synthesis of native Synthon 1 of 27C1

| Oligo name | Length | Sequence (5' ->3')                                       |
|------------|--------|----------------------------------------------------------|
| 27C1ns1-1  | 49     | TAGGAGGTCATATGGCTGGTCCACGTAGTCTGGCCGCCATGCCGGGGCC        |
| 27C1ns1-2  | 55     | CCGTCCCTGCAGAAGAACTCCGCCAGGTTGGCGAGGGTCTCGGCCCCGGCATGG   |
| 27C1ns1-3  | 55     | GTTCTTCTGCAGGGACGGCTTCAGCCGCATCCACGAGATCCAGCAGAAGCACACA  |
| 27C1ns1-4  | 55     | ACCAAAGTGAGACTTGAAGATTTTTCCATATCCCCTGTGTGCTTCTGCTGGATC   |
| 27C1ns1-5  | 55     | GAAAAATCTTCAAGTCTCACTTTGGTCCTCAGTTTGTAGTATCTATTGCAGACCG  |
| 27C1ns1-6  | 55     | TCCGCCCCGAGCACCTGAGCCACCATATCGCGGTCTGCAATAGATACTACAAACT  |
| 27C1ns1-7  | 55     | TGCTCCGGGCGGAGGGCGCTGCGCCCCAGAGAGCCAACATGGAGTCTTGCGGGA   |
| 27C1ns1-8  | 55     | CGAGATGAGCCCCGGTGGCTCTCCCCGCAAGTCTCGGTACTCCCGCCAGGACTCC  |
| 27C1ns1-9  | 55     | CACCGGGCTCATCTCGGCGGAGGGTGAACAGTGGCTCAAGATGAGAAGCGTATTG  |
| 27C1ns1-10 | 55     | GCCACATCTTTCGGTTTCAGAATTCTTTGTCTCAATACGCTTCTCATCTTGAGCC  |
| 27C1ns1-11 | 55     | TCTGAAACCGAAAGATGTGGCCATCTATTCTGGAGAAGTCAACCAAGTTATTGCT  |
| 27C1ns1-12 | 55     | TCCTGAGGAGGTAGATTCTTTTAATTAAGTCAGCAATAACTTGGTTGACTTCTCC  |
| 27C1ns1-13 | 55     | CTTAATTAAAAGAACTACCTCCTCAGGAGCCAGGCAGAAGATGGAGAAACCGTG   |
| 27C1ns1-14 | 55     | TTGAATATTTGAAGAAAAGATCATTGACATTGGTCACGGTTTCTCCATCTTCTGC  |
| 27C1ns1-15 | 55     | CCAATGTCAATGATCTTTTCTTCAAATATTCAATGGAAGGAGTGGCCACCATCCT  |
| 27C1ns1-16 | 55     | GGATGCTGTTTTCCAGGCAGCCCAAACGACTCTCATAAAGGATGGTGGCCACTCC  |
| 27C1ns1-17 | 55     | TGCCGTGAAAACAGCATCCCACAGCTGACTGTGGAATACATCGAGGCCCTGGAGC  |
| 27C1ns1-18 | 55     | GCGCCTGCATACATGGAGGTCTTGAACATGCTAAACATGAGCTCCAGGGCCTCGA  |
| 27C1ns1-19 | 55     | TCCATGTATGCAGGCGCCATCCCCAGATGGCTTCGCCCCCTTCATCCCAAAGCCCT |
| 27C1ns1-20 | 55     | TTGAAGAGTCCATCCCAGGACCTGCAGAATCCCAGGAGGGCTTTGGGATGAAGG   |
| 27C1ns1-21 | 55     | GTCTGGGATGGACTCTTCAAATTCAGCCAAATTCATGTTGACAACAAGTTGAGG   |
| 27C1ns1-22 | 55     | CCGGCCTCGGTCCATTTGGTACTGTATGTCCCTCAACTTGTGTCAACATGAATT   |
| 27C1ns1-23 | 55     | TGGACCGAGGCCGGAGGGTGGAGCGGGGACTTCTCACATACCTCTTCCTTAGCCA  |
| 27C1ns1-24 | 50     | GGCGTAGATCTCCTGCAGCGTCAGAGCCTGGCTAAGGAAGAGGTATGTGA       |

Table S2. Oligonucleotides for the synthesis of native Synthron 2 of 27C1

| Oligo name | Length | Sequence (5' → 3')                                       |
|------------|--------|----------------------------------------------------------|
| 27C1ns2-1  | 22     | GCAGGAGATCTACGCCAACGTG                                   |
| 27C1ns2-2  | 55     | ACGTCGTGTCGACGCCGCCAGCAGCATCTCAGTCACGTTGGCGTAGATCTCCTG   |
| 27C1ns2-3  | 55     | GGCGTCGACACGACGTCCTTACCTTGTCTTGGACTGTGTACCTCCTGGCAAGGC   |
| 27C1ns2-4  | 55     | CAATCTCCCGGTACACCGTCTGCTGCACCTTCTGGGTGCCTTGCCAGGAGGTACAC |
| 27C1ns2-5  | 55     | GACGGTGTACCGGGAGATTGTGAAGAATTTAGGGGAAAGGCATGTTCCAACCTGCA |
| 27C1ns2-6  | 55     | GAGCTCTGACCAGCGGGACCTTGGGGACATCAGCTGCAGTTGGAACATGCCTTTC  |
| 27C1ns2-7  | 55     | CCCGCTGGTCAGAGCTCTCCTTAAGGAAACCCTGAGGCTGTTTCCAGTGCTGCCA  |
| 27C1ns2-8  | 55     | AATAACCAGGTCTTCCCTGGGTGACCCGGCCGTTCCCTGGCAGCACTGGAAACAGC |
| 27C1ns2-9  | 55     | TCACCCAGGAAGACCTGGTTATTGGCGGGTATCTGATTCCGAAAGGCACCCAGCT  |
| 27C1ns2-10 | 55     | TCTCATCCTGGTACGATGTGGCATAGTGGCAAAGGGCCAGCTGGGTGCCTTTCGG  |
| 27C1ns2-11 | 55     | GCCACATCGTACCAGGATGAGAACTTCCCTCGGGCCAAGGAGTTCCGGCCTGAGC  |
| 27C1ns2-12 | 55     | ATTGTCAACTCTATCTAAGTCTCCTTTCGCGAGCCAGCGCTCAGGCCGGAACCTCC |
| 27C1ns2-13 | 55     | GGAAAGGAGACTTAGATAGAGTTGACAATTTTGGATCCATCCCCTTTGGTCATGG  |
| 27C1ns2-14 | 55     | TTCTGCAATTCTCCGCCCTATGCAGCTGCGAACCCCATGACCAAAGGGGATGGAT  |
| 27C1ns2-15 | 55     | ATAGGGCGGAGAATTGCAGAACTGGAGATTCACCTCGTCGTGATCCAGTTGCTTC  |
| 27C1ns2-16 | 55     | TTGGTCTGAGAAGATGTTTTGATCTCAAAATGTTGAAGCAACTGGATCACGACGA  |
| 27C1ns2-17 | 55     | TTTGAGATCAAAACATCTTCTCAGACCAATGCTGTTTCATGCAAAAACCCACGGGC |
| 27C1ns2-18 | 55     | CAAATCGCACGTGGATGGGCCCCCTGGCGTCAGGAGCCCGTGGGTTTTTGCATG   |
| 27C1ns2-19 | 55     | CCCATCCACGTGCGATTTGTTAACAGAAAGCACCATCATCACCATTAATCTAGAG  |
| 27C1ns2-20 | 32     | TACCTCTAGATTAATGGTGATGATGGTGCTTT                         |

Table S3. Oligonucleotides for the synthesis of optimized 2B1

| Oligo name | Length | Sequence (5' ->3')                                   |
|------------|--------|------------------------------------------------------|
| 2B1-1      | 49     | TAGGAGGTCATATGGCTCTGTTATTAGCAGTTTTTCTGGCGCTGCTGGT    |
| 2B1-2      | 50     | GTGACCACGCACCAGTAACAGTAAGAAGCCAACCAGCAGCGCCAGAAAA    |
| 2B1-3      | 50     | CTGTTACTGGTGGTGGTACCCAAAATCTCGCGGTAATTTTCCACCAGG     |
| 2B1-4      | 50     | AGTTGCCTAACAGCGGCAGTGGACGCGGACCTGGTGGAAAAATTACC      |
| 2B1-5      | 50     | TGCCGCTGTTAGGCAACTTATTACAGTTAGACCGTGGCGGTCTGTTAAAC   |
| 2B1-6      | 50     | GCCGTATTTTTACGTAATTGCATGAAAGAGTTTAAACAGACCGCCACGGT   |
| 2B1-7      | 50     | CATGCAATTACGTGAAAAATACGGCGATGTTTTTACCCTGCATTTAGGCC   |
| 2B1-8      | 50     | CCACATAACATGACAACTGGACGTGGGCCATAATGCACGGTAAAAACATC   |
| 2B1-9      | 50     | ACGTCCAGTTGTCATGTTATGTGGCACCACACCATTAAGAAGCGTTAG     |
| 2B1-10     | 50     | CCGCTGAAAATCTTCTGCTTGGCCGACTAACGCTTCTTTAATGGTGTCCGGT |
| 2B1-11     | 50     | CCAAGCAGAAGATTTACAGCGGCCGTGGTACGATCGCAGTGATCGAACCAA  |
| 2B1-12     | 50     | GGCGAAGATAACACCATAATTCCTTAAAGATTGGTTCGATCACTGCGATCG  |
| 2B1-13     | 50     | TCTTTAAGGAATATGGTGTATCTTCGCCAATGGCGAACGTTGGAAAGCC    |
| 2B1-14     | 50     | TCGCGCATCGTTGCCAGAGAGAAGCGACGTAAGGCTTTCCAACGTTCCGCC  |
| 2B1-15     | 50     | TGGCAACGATGCGCGATTTTCGGCATGGGTAAACGTAGCGTGGAAAGCGGT  |
| 2B1-16     | 50     | TCCTCGACTAAGCATTTGGGCCCTCCTCTTGAATACGCTTTCCACGCTACG  |
| 2B1-17     | 50     | GCCCAATGCTTAGTTCGAGGAGCTGCGCAAAAGCCAGGGCGCACCACTGGA  |
| 2B1-18     | 50     | TATTGGCCGTAATACATTGAAACAGAAAGGTCGGATCCAGTGGTGGCC     |
| 2B1-19     | 50     | CTTTCTGTTTCAATGTATTACGGCCAATATCATTTGCAGCATCGTGTTCG   |
| 2B1-20     | 50     | TTGACGATCCGTGTAATCAAAACGCTCGCCGAACACGATGCTGCAAAATGA  |
| 2B1-21     | 50     | CGTTTTGATTACACGGATCGTCAATTCCTGCGTTTACTGGAACGTTTTTA   |
| 2B1-22     | 50     | GCTGCTTAATAAGCTGAACGTGCGATAAAAACAGTTCAGTAAACGCAGGA   |
| 2B1-23     | 50     | GCACGTTACGCTTATTAAGCAGCTTTAGCAGCCAAGTTTTTCGAGTCTTT   |
| 2B1-24     | 50     | CCGGGAAGTATTTTCAGGAAGCCGCTAAAGAACTCGAAAACCTGGCTGCTA  |
| 2B1-25     | 50     | GGTTCCTGAAATACTTCCCAGGTGCCACCAGCAGATTAGCAAGAAATTT    |
| 2B1-26     | 50     | TGGCCGATATAGTCCAGGATCTCCTGTAAATTCCTGCTAATCTGGCGGTG   |
| 2B1-27     | 50     | GAGATCCTGGACTATATCGGCCATATTGTGAGAAACACCGCGCGACCTT    |
| 2B1-28     | 50     | GTATCGATGAAGTCAAGTGGGGCGCTCGGGTCTAAGGTCGCGCGGTGTTT   |
| 2B1-29     | 50     | CCCCACGTGACTTCATCGATACTACCTGTTACGTATGGAGAAGGAAAAAG   |
| 2B1-30     | 50     | GGAACACGGTATGGTGTGCTCTTTTCTTCTCCATACGTAACAGGTAG      |
| 2B1-31     | 50     | GCAATCACCATACCGTGTTCATCAGAGAATCTGATGATCAGCCTGCTG     |
| 2B1-32     | 50     | CGTTTCCGTGCCTGCGAAAAACAGAGACAGCAGGCTGATCATCAGATTCT   |
| 2B1-33     | 50     | TCGCAGGCACGGAACGTTAGCACCACCTTACGCTATGGTTTCTCTGCTG    |
| 2B1-34     | 50     | TTCCGGCCACGTGTGGGTACTTTAACATCAGCAGGAAACCATAGCTTAAGG  |
| 2B1-35     | 50     | CCCACACGTGGCCGAAAAGGTTTCAGAAGGAGATTGATCAGGTTATCGGCT  |
| 2B1-36     | 50     | TCATCTAACGTCGGTAAGCGGTGAGAGCCGATAACCTGATCAATCTCCTT   |
| 2B1-37     | 50     | CCGCTTACCAGCGTTAGATGATCGTTCCTAAGATGCCGTACACCGATGCAG  |
| 2B1-38     | 50     | TAAATCGCTAAAACGTTGAATTTTCGTGGATAACTGCATCGGTGTACGGCA  |
| 2B1-39     | 50     | CCACGAAATTCACGTTTTTAGCGATTTAGTCCCATTGGCGTTCCACATC    |
| 2B1-40     | 50     | TAACCGCGAACATGGTATCTTTTCGTGACGCGATGTGGAACGCCAATCGG   |
| 2B1-41     | 50     | AAAGATACCATGTTCCGCGGTTATTTACTGCCAAAAAACACGGAAGTCTA   |
| 2B1-42     | 50     | GTGCAGGGCAGAGCTCAGAAATGGGTAGACTTCCGTGTTTTTTGGCAGTA   |
| 2B1-43     | 50     | TGAGCTCTGCCCTGCACGATCCACAATATTTTCGACCATCCAGATAGCTTC  |
| 2B1-44     | 50     | ATCCAGGAAATGCTCTGGGTTGAAGCTATCTGGATGGTCAAATATTTGTG   |
| 2B1-45     | 50     | AACCCAGAGCATTTCTTGGATGCAAACGGCGCACTGAAAAAATCTGAAGC   |
| 2B1-46     | 50     | CGTTTGGCCGGTGTAAATGGCATGAAGGCTTCAGATTTTTTTTTCAGTGGCC |
| 2B1-47     | 50     | CCATTTAGCACCGGCAACGTAATTTGCCTGGGTGAGGGCATCGCGCGTAA   |
| 2B1-48     | 50     | TGTAATAATCGTGGTGAAGAACAGGAACAGCTCATTTACGCGCGATGCCCTC |
| 2B1-49     | 50     | TCTTGTCTTTCACCACGATTTTACAGAACTTCTCTGTGACGCTCATCTG    |
| 2B1-50     | 50     | GGGTTAAGTCAATATCTTTCGGGGCCAGATGAGAGCTGACAGAGAAGTTC   |
| 2B1-51     | 50     | CCCCGAAGGATATTGACTTAACCCAAAAAGAGAGCGGTATCGGCAAGATC   |
| 2B1-52     | 50     | GCGCTGAAGCAAATCTGGTACGTTGGCGGGATCTTGCCGATACCGCTCTC   |
| 2B1-53     | 50     | GTACCAGATTTGCTTCAGCGCACGCCATCATCACCACCATCACTAATCTA   |
| 2B1-54     | 32     | TACCTCTAGATTAGTGATGGTGGTGTGATGATGG                   |

Table S4. Oligonucleotides for site direct mutagenesis of 2S1 and 2U1 to modify N-terminal contiguous rare codons.

| Constructs | Primers (5'-3')                             |
|------------|---------------------------------------------|
| 2S1C1      | 2S1C1F GGGAAAGCTGCCGCCAGGGCCAACGCCGCTACC    |
|            | 2S1C1R GGTAGCGGCGTTGGCCCTGGCGGCAGCTTCCC     |
| 2S1C2      | 2S1C2F CCTCCTGCAGCTGCGTCCGGGGGCGCTGTATTC    |
|            | 2S1C2R GAATACAGCGCCCCGGACGCAGCTGCAGGAGG     |
| 2U1C1      | 2U1C1F GTAAGCTGCCGCCGGGGCCAACGCCGTGGCCTCTGG |
|            | 2U1C1R CCAGAGGCCACGGCGTTGGCCCTGGCGGCAGCTTAC |
| 2U1C2      | 2U1C2F CTCCCTTCCTCCGTTCGCGTAGCTGGCTGAGC     |
|            | 2U1C2R GCTCAGCCAGCTACGGCGACGGAGGAAGGGAG     |
| 2U1C3      | 2U1C3F CTGGCTGAGCAGCCGTACCCGCGCCGAGGGATTG   |
|            | 2U1C3R CAATCCCTGCGGCGCGGGTACGGCTGCTCAGCCAG  |



Table S6. Nucleotide analysis of P450s with optimized or original codons. Estimated online using Optimizer (<http://genomes.urv.es/OPTIMIZER/>).

|         | CAI   | %GC  | %AT  |
|---------|-------|------|------|
| 27C1opt | 0.562 | 53.3 | 46.7 |
| 27C1org | 0.313 | 54.3 | 45.7 |
| 2W1opt  | 0.537 | 57.3 | 42.7 |
| 2W1orgt | 0.342 | 68.9 | 31.1 |
| 2B1opt  | 0.554 | 49.2 | 50.8 |
| 2B1org  | 0.324 | 51.2 | 48.8 |

Fig.S1 Modifications introduced into P450 2B1 cDNA to optimize codon usage in *E. coli*. Top line, predicted amino acid sequence; middle line, original nucleotide sequence; lower line, nucleotide sequence optimized for *E. coli* expression.

|     |                                                                                         |      |
|-----|-----------------------------------------------------------------------------------------|------|
|     | M A L L L A V F L A L L V G F L L L L V R G H P K S R G N                               |      |
| ORI | ATGGCTCTGTTATTAGCAGTTTTCTGGCTCTGTTAGTTGGTTTTCTGTTACTCTTAGTCCGTGGTACACCAAAGTCCCGTGGCAAC  | 87   |
| OPT | -----G--C-G-----C--CT-AC-GT-AC-G-G-----A--T--C--T--T                                    | 87   |
|     | F P P G P R P L P L L G N L L Q L D R G G L L N S F M Q L                               |      |
| ORI | TTCCACCCAGGACCTCGTCCCTTCCCCTCTGGGAACTCCTGCAGTTGGACAGAGGGGCTCCTCAATTCCTTTCATGCAGCTT      | 174  |
| OPT | --T-----T-G--D--A-G--G--G--A--C--T-AT-A-----A--C-T-C--T--GT-A--C--T-----AT-A            | 174  |
|     | R E K Y G D V F T V H L G P R P V V M L C G T D T I K E A                               |      |
| ORI | CGAGAAAAATATGGAGATGTGTTACAGTACACCTGGGACCAAGGCCGTGGTGCATGCTATGTGGGACAGACACCATAAAGGAGGCT  | 261  |
| OPT | --T-----C-C-----T--T--C--G--TT-A--C--C--T--A--T-----T-----C-C-----T--A--A--G            | 261  |
|     | L V G Q A E D F S G R G T I A V I E P I F K E Y G V I F A                               |      |
| ORI | CTGGTGGCCAAAGCTGAGATTCTCTGGTGGGGAACAATCGCTGTGATTGAGCCAATCTCAAGGAATATGGTGTGATCTTTGCC     | 348  |
| OPT | T-A-C-----A-A-----AGC--C--T--T--G-----A-----C-A-----T-----T-----C--                     | 348  |
|     | N G E R W K A L R R F S L A T M R D F G M G K R S V E E R                               |      |
| ORI | AATGGGGAACGCTGGAAGGCCCTTCGGCGATTCTCTGGCTACCATGAGAGACTTTGGGATGGGAAAGAGGAGTGGGAAGAACGG    | 435  |
| OPT | -----C-----T--A--T--A--T--C-----A--G--C--C--T--C--C-----T--AC--T--C-----G--T            | 435  |
|     | I Q E E A Q C L V E E L R K S Q G A P L D P T F L F Q C I                               |      |
| ORI | ATTCAAGGAGGAAGCCCAATGTTGGTGGAGGAAGTGGGAAATCCAGGGAGCCCCACTGGATCCCACCTTCTCTTCCAGTGCATC    | 522  |
| OPT | -----A--G-----C--A--C-----G-----C--AG-----C--A-----G-----T--G--T--A--T--T               | 522  |
|     | T A N I I C S I V F G E R F D Y T D R Q F L R L L E L F Y                               |      |
| ORI | ACAGCCAACATCATCTGCTCCATTGTGTTGGAGAGCGCTTTGACTACACAGCCAGTTCCTACGCCTGTGGAGTGTCTTAC        | 609  |
| OPT | --G-----T-----T--AG--C--C--C-----T-----T-----G--T--A-----G--TT-AC--A-----T--T           | 609  |
|     | R T F S L L S S F S S Q V F E F F S G F L K Y F P G A H R                               |      |
| ORI | CGGACCTTTTCCTCCTAAGTTCATCTCCAGCCAGGTGTTGAGTCTTCTCTGGGTTCCTGAAATACTTTCCCTGGTGGCCACAGA    | 696  |
| OPT | --C--G--CAG--T-AT--CAGC--TAG--A--T--C-----TAGC--C-----C--G-----C--C                     | 696  |
|     | Q I S K N L Q E I L D Y I G H I V E K H R A T L D P S A P                               |      |
| ORI | CAAAATCTCAAAAACCTCCAGGAAATCCTCGATTACATGGCCATATTGTGGAGAAGCACAGGGCCACCTTAGACCCAAGCGTCCA   | 783  |
| OPT | --G--TAG--G--TT-A--G--G--G--C--T--C-----C-----A--C--C--G-----G-----C--                  | 783  |
|     | R D F I D T Y L L R M E K E K S N H H T V F H H E N L M I                               |      |
| ORI | CGAGACTTCATCGACACTTACCTTCTGCGCATGGAGAAGGAGAAGTGAACACACAGTGTCCATCATGAGAACCTCATGATC       | 870  |
| OPT | --T-----T--C-----GT-A--T-----A--AGC--T-----T--C-----T--G-----                           | 870  |
|     | S L L S L F F A G T E T S S T T L R Y G F L L M L K Y P H                               |      |
| ORI | TCCTGTCTCTCTTCTTTGCTGGCACTGAGACCAGCAGCACCACACTCCGCTATGTTTCTGCTGATGCTCAAGTACCCCAT        | 957  |
| OPT | AG-----G--G--T--C--A--G--A--GTCT-----CT-A-----T-A-----A--C                              | 957  |
|     | V A E K V Q K E I D Q V I G S H R L P T L D D R S K M P Y                               |      |
| ORI | GTCGCAGAGAAAGTCCAAAAGGAGATTGATCAGGTGATCGGCTCACACCGGTACCAACCCTTGATGACCGCAGTAAAAATGCCATAC | 1044 |
| OPT | --G--C--A--G--T--G-----T-----T-----CT--G--GT-A-----T--TTC--G-----G--                    | 1044 |
|     | T D A V I H E I Q R F S D L V P I G V P H R V T K D T M F                               |      |
| ORI | ACTGATGCAGTTATCCATGAGATTCAGAGGTTTTAGATCTTGTCCCTATTGGAGTACCACAGAGTCCACCAAGACACCATGTTCC   | 1131 |
| OPT | --C-----C--A-----AC-T--AGC--T--A-----G-----C--T-----TC-C-----G--T-----                  | 1131 |
|     | R G Y L L P K N T E V Y P I L S S A L H D P Q Y F D H P D                               |      |
| ORI | CGAGGGTACCTGCTTCCCAAGAACACTGAAGTGTACCCATCCTGAGTTACGCTCTCCATGACCCACAGTACTTTGACCACCCAGAC  | 1218 |
| OPT | --C--T--TT-A--G--A--A--G--C-----A--T-----C--T--C--G--C--T-----A--T--C-----T-----T       | 1218 |
|     | S F N P E H F L D A N G A L K K S E A F M P F S T G K R I                               |      |
| ORI | AGCTTCAATCCTGAACACTTCTGGATGCCAATGGGGCACTGAAAAAGAGTGAAGCTTTCATGCCCTTCTCCACAGGAAAGCGCATT  | 1305 |
| OPT | -----C--A--G--T-----A--C--C-----ATC-----C-----A--TAG--C--C--A--T-----                   | 1305 |
|     | C L G E G I A R N E L F L F F T T I L Q N F S V S S H L A                               |      |
| ORI | TGCTTTGGGAAGGCATTGCCGAAATGAATTGTTCTCTTCTTACCACCATCCTCCAGAACTTCTGTGTCAAGCCATTGGCT        | 1392 |
| OPT | --C--G--T--G-----C--G--T-----GC-----G-----G--TT-A-----CAGCTCT--C--C                     | 1392 |
|     | P K D I D L T P K E S G I G K I P P T Y Q I C F S A R H H                               |      |
| ORI | CCCAAGGACATTGACCTCACGCCAAGGAGAGTGGCATTGGAATAACCTCCAACGTACCAGATCTGTTCTCAGCTGGCACCAC      | 1479 |
| OPT | --G-----T-----T--A--C--A--A-----C--T--C--C--G--C--G-----T-----AGC--A--C--T--T           | 1479 |
|     | H H H                                                                                   |      |
| ORI | CACCACCACTAA                                                                            | 1491 |
| OPT | -----T---                                                                               | 1491 |
